# Supplementary material for: An inducible circular RNA circKcnt2 inhibits ILC3 activation to facilitate colitis resolution
Source: PubMed Central journal article supplement (PMC7427797; doi:10.1038/s41467-020-17944-5), 2020-08-14
Supplement: 41467_2020_17944_MOESM1_ESM.pdf [file 41467_2020_17944_MOESM1_ESM.pdf]

**An inducible circular RNA *circKcnt2* inhibits ILC3 activation to facilitate colitis resolution**

Liu *et al.*

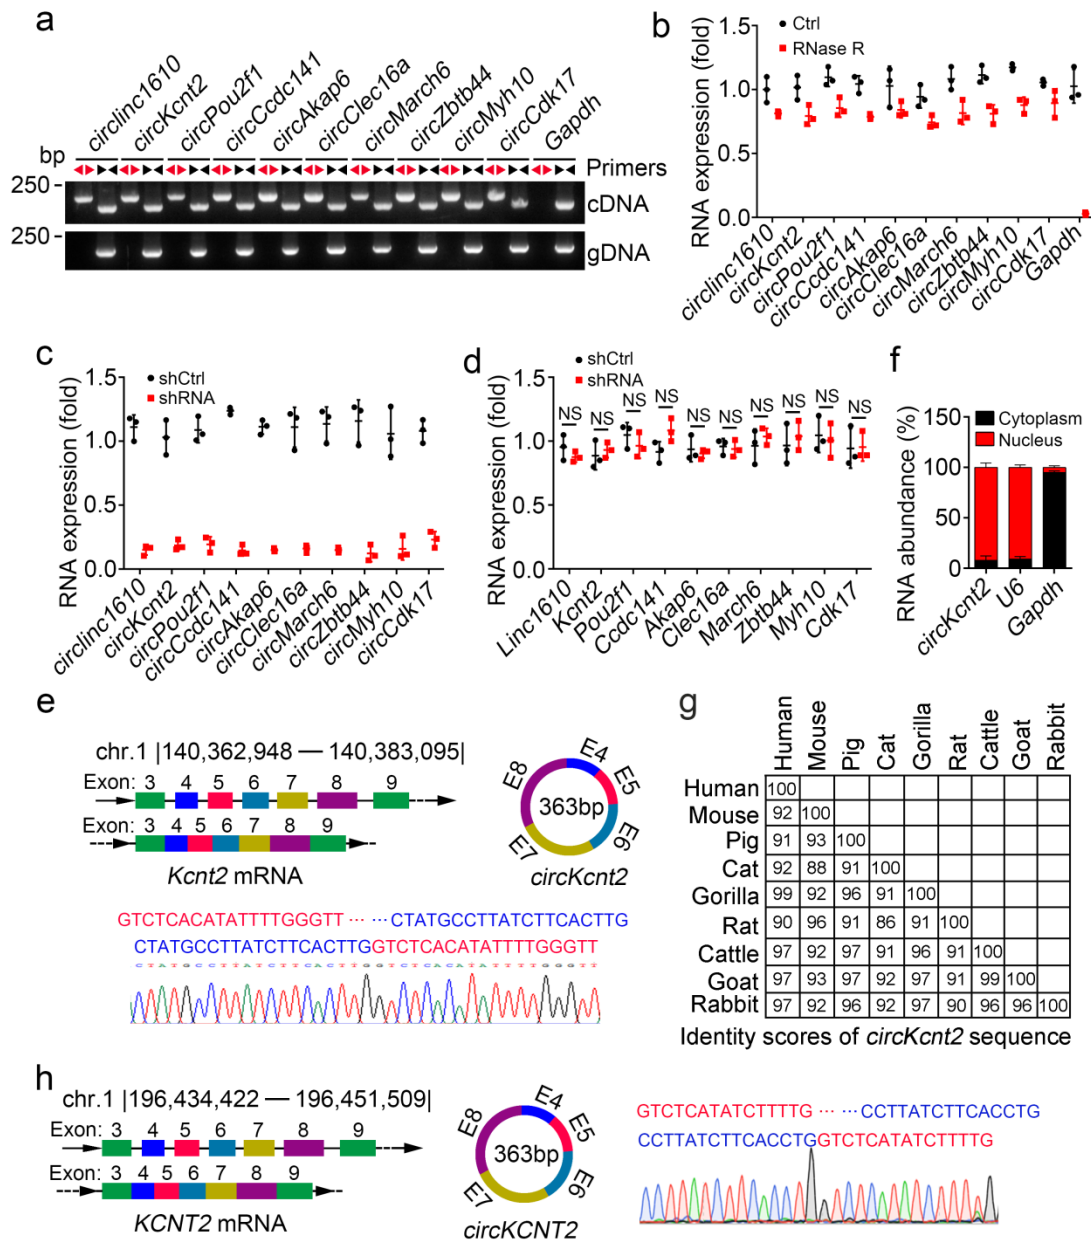

**Supplementary Fig. 1. Validation of upregulated circRNAs in ILC3s.** (a) Complementary DNA (cDNA) and genomic DNA (gDNA) were used as templates to amplify circRNAs in ILC3s using divergent and convergent primers. Red arrowheads, divergent primers; black arrowheads, convergent primers. (b) Total RNAs from ILC3s were treated with or without 3 U/ $\mu$ g RNase R for 1 h, followed by RNA extraction and RT-PCR analysis.  $n = 3$  independent samples. (c) 14 days after DSS treatment, GFP<sup>+</sup> ILC3s were isolated from *Rag1*<sup>-/-</sup>*Il2rg*<sup>-/-</sup> mice for validation of knockdown efficiency via qRT-PCR.  $n = 3$  independent samples. (d) Relative expression levels of indicated cognate linear transcripts against respective circRNAs were measured by qRT-PCR. NS, no significance.  $n = 3$  independent samples. (e) Validation of *circKcnt2* in mouse ILC3s by DNA sequencing. Back-splicing site of *circKcnt2* was presented.  $n = 3$  independent samples. (f) ILC3s isolated from DSS-treated *Rag1*<sup>-/-</sup> mice were subjected to nuclear and cytoplasmic separation, followed by RNA extraction and qRT-PCR analysis of *circKcnt2*.

n=3 independent samples. (g) Sequence conservation of *circKcnt2* in indicated vertebrates. (h) Validation of *circKCNT2* in human LPL cells by DNA sequencing. Data were analyzed by an unpaired Student's *t*-test and shown as means  $\pm$  SD. Data are representative of at least three independent experiments. Source data are provided as a Source Data file.

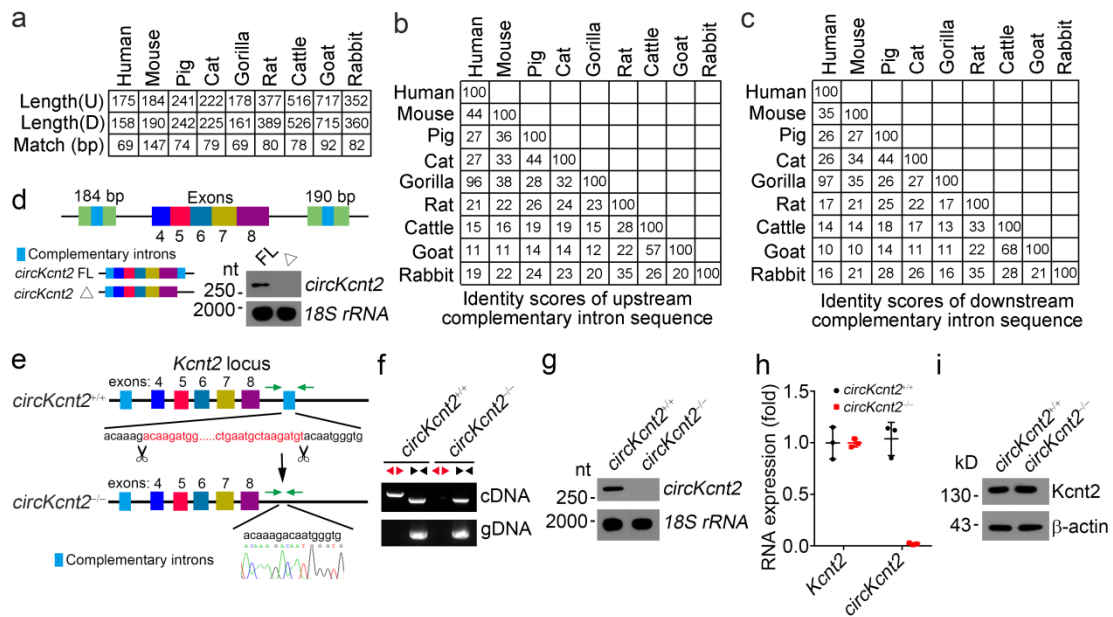

**Supplementary Fig. 2. Construction of *circKcnt2*-deficient mice.** (a) Information of complementary introns of *circKcnt2* in indicated vertebrates. U, upstream; D, downstream. (b, c) Analysis of conservation of upstream and downstream complementary intron sequences by DNAMAN software in indicated vertebrates. (d) Diagram of exons (exon4 to exon8) and complementary introns for *circKcnt2* formation. These exons and indicated complementary introns were cloned into pcDNA3 vector, followed by transfection into 293T cells for minigene assay. *circKcnt2* expression was examined by Northern blotting. 18S rRNA was used as a loading control. Minigene assay validated the requirement of intronic sequences for *circKcnt2* formation. (e) Construction diagram of *circKcnt2* knockout mice. (f-h) *CircKcnt2* deletion was confirmed by PCR, Northern blotting and qRT-PCR in ILC3s. Red arrowheads denote primers for *circKcnt2* detection. Black arrowheads denote primers for linear *Kcnt2* detection. n = 3 independent samples. (i) *Kcnt2* expression in ILC3s was tested by Western blotting. Data were analyzed by an unpaired Student's *t*-test and shown as means  $\pm$  SD. Data are representative of at least three independent experiments. Source data are provided as a Source Data file.

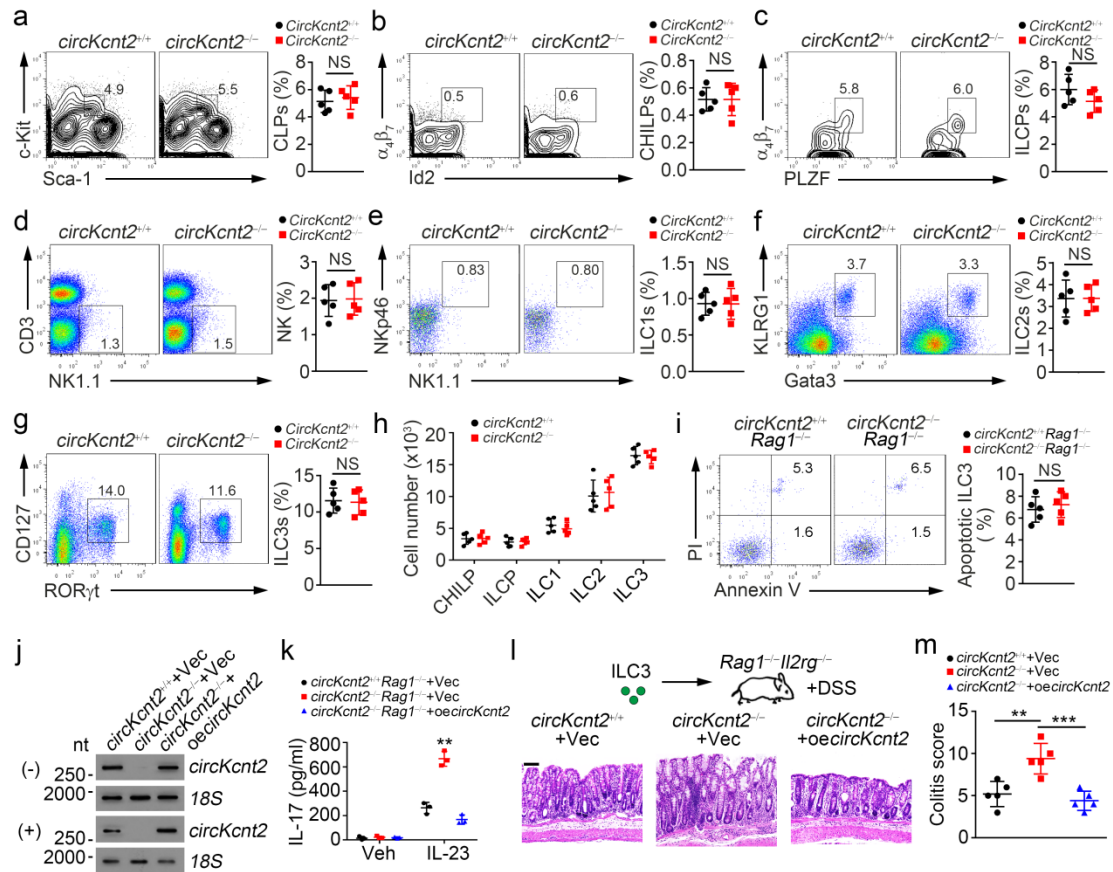

**Supplementary Fig. 3. *circKcnt2* deletion does not affect ILC3 development and apoptosis.** (a-c) Analyses of CLPs, CHILPs and ILCPs in *circKcnt2*<sup>+/+</sup> and *circKcnt2*<sup>-/-</sup> mice. CLP was gated on Lin<sup>-</sup>CD127<sup>+</sup>Sca-1<sup>low</sup>c-Kit<sup>low</sup>Flt3<sup>+</sup>. CHILP was gated on Lin<sup>-</sup>CD127<sup>+</sup>Flt3<sup>-</sup>CD25<sup>-</sup>Id2<sup>+</sup> $\alpha_4\beta_7$ <sup>+</sup>. ILCP was gated on Lin<sup>-</sup>Flt3<sup>-</sup>CD127<sup>+</sup>c-Kit<sup>+</sup> $\alpha_4\beta_7$ <sup>+</sup>PLZF<sup>+</sup>. n = 5 independent samples. (d-g) FACS analyses of NK, ILC1, ILC2 and ILC3 in the small intestines of *circKcnt2*<sup>+/+</sup> and *circKcnt2*<sup>-/-</sup> mice. NK was gated on CD127<sup>-</sup>CD19<sup>-</sup>CD3<sup>-</sup>NK1.1<sup>+</sup>. ILC1 was gated on CD3<sup>-</sup>CD19<sup>-</sup>CD127<sup>+</sup>NK1.1<sup>+</sup>NKp46<sup>+</sup>. ILC2 was gated on Lin<sup>-</sup>CD127<sup>+</sup>CD90<sup>+</sup>KLRG1<sup>+</sup>Gata3<sup>+</sup>. ILC3 was gated on Lin<sup>-</sup>ROR $\gamma$ t<sup>+</sup>CD45<sup>low</sup>CD127<sup>+</sup>. n = 5 independent samples. (h) Numbers of indicated cell types in *circKcnt2*<sup>+/+</sup> and *circKcnt2*<sup>-/-</sup> mice. n = 5 independent samples. (i) Detection of ILC3 apoptosis in *circKcnt2*<sup>+/+</sup> *Rag1*<sup>-/-</sup> and *circKcnt2*<sup>-/-</sup> *Rag1*<sup>-/-</sup> mice after DSS treatment. n = 5 independent samples. (j) ILC3s isolated from *circKcnt2*<sup>+/+</sup> and *circKcnt2*<sup>-/-</sup> mice were infected with *circKcnt2*-overexpressing lentivirus (pSIN-EF2-GFP) or control lentivirus. *circKcnt2* expression in infected ILC3s with or without RNase R treatment was detected by Northern blotting using back-splicing junction-specific biotin-labeled probe (targeting *circKcnt2*: nt 262 ~ 127). (-): without RNase R; (+) with RNase R. (k) Indicated ILC3s were infected with *circKcnt2*-overexpressing lentivirus (pSIN-EF2-GFP) or control. ELSIA assay was performed at the presence of IL-23 or Vehicle (Veh) (\*\*\*) *P* = 0.0008. Vec, Vector. n = 3 independent samples. (l) H&E staining of colon tissues. *CircKcnt2*<sup>-/-</sup> ILC3s were isolated and infected with lentivirus for *circKcnt2* restoration. ILC3s were transplanted into *Rag1*<sup>-/-</sup> *Il2rg*<sup>-/-</sup> mice, followed by 3% DSS treatment. Scale bar, 100  $\mu$ m. (m) Colitis scores of indicated mice as in K. n=5 for each

group (\*\*  $P = 0.0039$ ; \*\*\*  $P = 0.0008$ ). \*\*  $P < 0.01$ . Data were analyzed by an unpaired Student's  $t$ -test and shown as means  $\pm$  SD. Data are representative of at least three independent experiments. Source data are provided as a Source Data file.

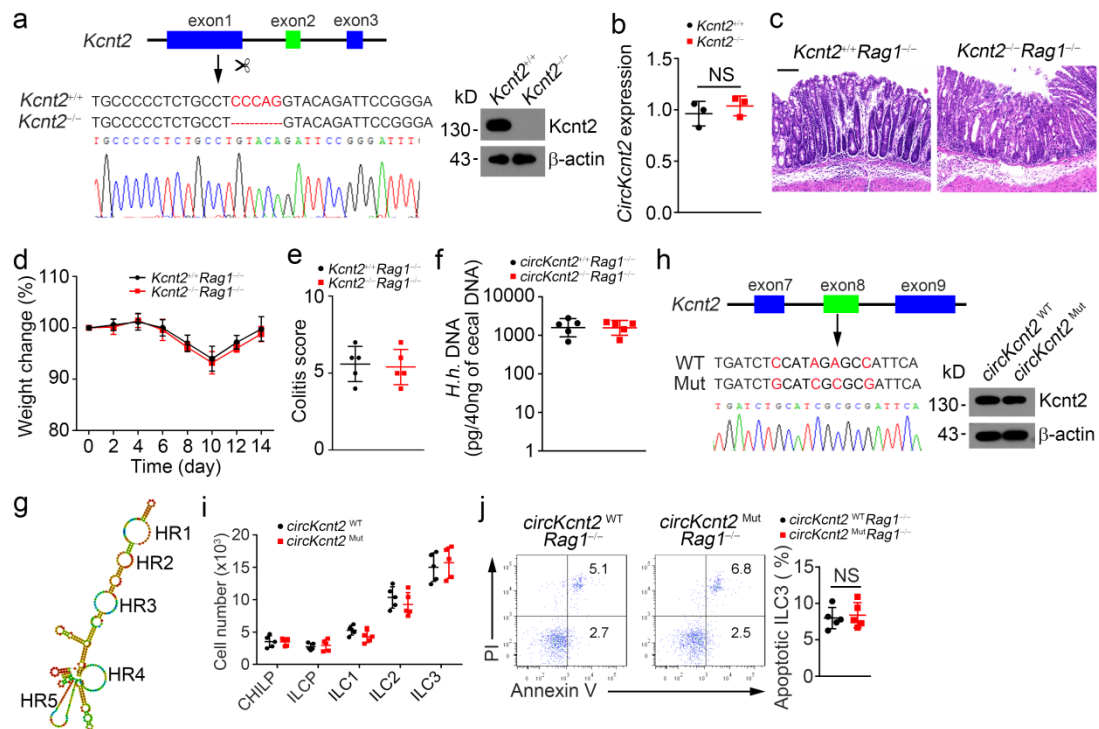

**Supplementary Fig. 4. Analysis of *Kcnt2* deletion during ILC3-mediated inflammation.** (a) Validation of *Kcnt2* deletion in ILC3s isolated from *Kcnt2*<sup>-/-</sup> mice by Western blotting. (b) qRT-PCR analysis for *circKcnt2* expression in *Kcnt2*<sup>+/+</sup> and *Kcnt2*<sup>-/-</sup> ILC3s ( $P = 0.4355$ ). (c) *Kcnt2*<sup>+/+</sup>*Rag1*<sup>-/-</sup> and *Kcnt2*<sup>-/-</sup>*Rag1*<sup>-/-</sup> mice were treated with 3% DSS, and colons were isolated and analyzed by H&E staining. Scale bar, 100  $\mu$ m. (d) Body weight changes of DSS-treated *Kcnt2*<sup>+/+</sup>*Rag1*<sup>-/-</sup> and *Kcnt2*<sup>-/-</sup>*Rag1*<sup>-/-</sup> mice were calculated.  $n=5$  for each group. (e) Colitis scores of indicated mice treated as in (c).  $n=5$  for each group. (f) Analysis of *H.h.* DNA in cecal contents of infected *circKcnt2*<sup>+/+</sup>*Rag1*<sup>-/-</sup> and *circKcnt2*<sup>-/-</sup>*Rag1*<sup>-/-</sup> mice by qRT-PCR.  $n=5$  for each group. (g) Prediction of stem-loop structures of *circKcnt2* by using RNAfold WebServer (<http://rna.tbi.univie.ac.at/>). Predictions were based on minimum free energy (MFE) and partition function. HR, hairpin region. (h) Construction strategy for *circKcnt2*-mutant (*circKcnt2*<sup>Mut</sup>) mice. Western blotting analysis of *Kcnt2* in *circKcnt2*<sup>WT</sup> and *circKcnt2*<sup>Mut</sup> ILC3s. (i) Analyses of CHILPs, ILCPs, ILC1s, ILC2s and ILC3s in *circKcnt2*<sup>WT</sup> and *circKcnt2*<sup>Mut</sup> mice.  $n=5$  independent samples. (j) Apoptosis of *circKcnt2*<sup>WT</sup>*Rag1*<sup>-/-</sup> and *circKcnt2*<sup>Mut</sup>*Rag1*<sup>-/-</sup> ILC3s were analyzed by Annexin V/PI staining after 3% DSS treatment ( $P = 0.7028$ ).  $n=5$  independent samples. Data were analyzed by an unpaired Student's *t*-test and shown as means  $\pm$  SD. Data are representative of at least three independent experiments. Source data are provided as a Source Data file.

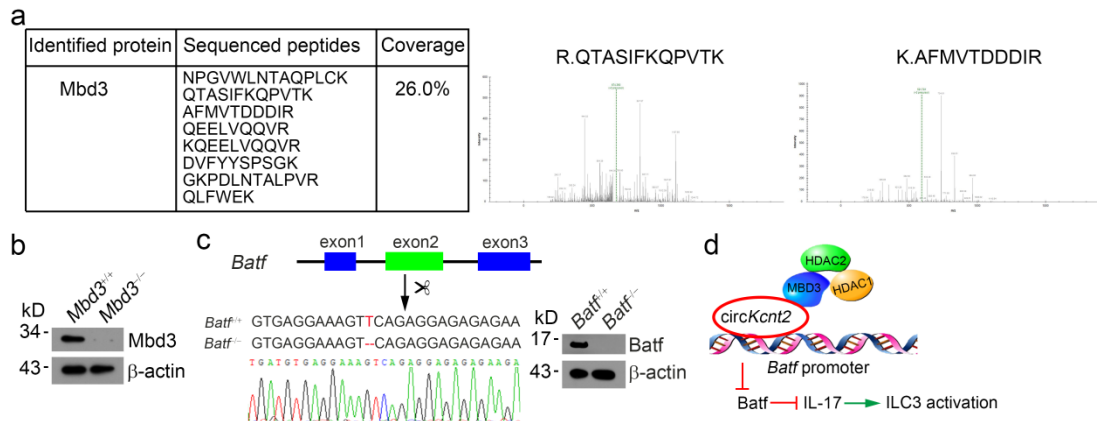

**Supplementary Fig. 5. Mbd3 deletion promotes ILC3-mediated innate colitis.** (a) Peptides of Mbd3 were identified by mass spectrometry. (b) Western blotting analysis of Mbd3 expression in *Mbd3*<sup>+/+</sup> and *Mbd3*<sup>-/-</sup> ILC3s. (c) Construction strategy of *Batf*-deficient mice. (d) Work model of *circKcnt2*-mediated resolution of innate colitis. *CircKcnt2* recruits the NURD complex onto *Batf* promoter to inhibit its expression, which suppresses *I17* expression for ILC3 inactivation to promote innate colitis resolution. Data were analyzed by an unpaired Student's *t*-test and shown as means  $\pm$  SD. Data are representative of at least three independent experiments.



**Supplementary Table 1. Mutation sequences for *circKcnt2* loops.**

| Loop | Wild-type sequence      | Mutant sequence         |
|------|-------------------------|-------------------------|
| HR1  | 5'-GTCTCACAT-3'         | 5'-GTAACCCCA-3'         |
| HR2  | 5'-CTCAGTG-3'           | 5'-GAAGGTG-3'           |
| HR3  | 5'-ATTTTGATATCT-3'      | 5'-TTTCAAATAGCT-3'      |
| HR4  | 5'-TTAATGATCT-3'        | 5'-ATGGCTCTAT-3'        |
| HR5  | 5'-TCTCAATATTCTGGCCC-3' | 5'-ACTCATTATTCTAATAG-3' |

**Supplementary Table 2. sgRNAs for CRISPR/Cas9-mediated mouse construction**

| Genes                           | sgRNA sequences               |
|---------------------------------|-------------------------------|
| <i>circKcnt2</i> (up)           | 5'-ATTGTCATACAAAGACAAGATGG-3' |
| <i>circKcnt2</i> (down)         | 5'-CTGAATGCTAAGATGTACAATGG-3' |
| <i>Batf</i>                     | 5'-ATGATGTGAGGAAAGTTCAGAGG-3' |
| <i>Kcnt2</i>                    | 5'-TCCCGGAATCTGTACCTGGGAGG-3' |
| <i>circKcnt2</i> <sup>Mut</sup> | 5'-TGCAGACTGTGTACGCTGAATGG-3' |

**Supplementary Table 3. Primers for PCR and qRT-PCR. (Co: Convergent primer; Di: Divergent primer)**

| Genes                    | Forward                      | Reverse                      |
|--------------------------|------------------------------|------------------------------|
| <i>circKcnt2</i> (Di)    | 5'-TTAATGATCTCCATAGAGCC-3'   | 5'-CCTGTAAACCCCATAAAGGT-3'   |
| <i>circKcnt2</i> (Co)    | 5'-TATAAGGGAAATATCTGGGA-3'   | 5'-CTTAAGGTGGGCCAGAATAT-3'   |
| <i>circIinc1610</i> (Di) | 5'-ATTGATGAAAATCACCTCAG-3'   | 5'-TGTGGCCCACACCCATAATC-3'   |
| <i>circIinc1610</i> (Co) | 5'-TGTATCTTCTAATCCACCAA-3'   | 5'-AGGTGCTTCAAGCGGCATGT-3'   |
| <i>circPou2f1</i> (Di)   | 5'-ACAGACAGACAAAATAAGT-3'    | 5'-TGCAAAAGATGGATAAGAGA-3'   |
| <i>circPou2f1</i> (Co)   | 5'-TAATCAGAATAGTAGATGTG-3'   | 5'-TGAAAGGATATACTAGACAAG-3'  |
| <i>circCcdc141</i> (Di)  | 5'-TCCTCGTGCTTGCAGATTAG-3'   | 5'-GGGGTAAAGCCCATTCCGTT-3'   |
| <i>circCcdc141</i> (Co)  | 5'-AGGACCTGATAGTCAAAGCA-3'   | 5'-TCCTTTCTGCCAAGTCCTT-3'    |
| <i>circAkap6</i> (Di)    | 5'-GAAGATCGACATAGTAACAT-3'   | 5'-TCTGTCTCATCCCATTCCAG-3'   |
| <i>circAkap6</i> (Co)    | 5'-TGGTTGACATCCTATAAGAG-3'   | 5'-TCCTCTTGCTCAGCTCACCA-3'   |
| <i>circClec16a</i> (Di)  | 5'-ACTGACTCGGGAGGAGGACCT-3'  | 5'-GCGCTCTTCTCCTCGTCTGT-3'   |
| <i>circClec16a</i> (Co)  | 5'-GTGCCAAGTGAAGCTGAGAA-3'   | 5'-ACCGGATCCTGCCATCTGGC-3'   |
| <i>circMarch6</i> (Di)   | 5'-TATTGATGGTCGTTGTGCTG-3'   | 5'-CAGTACATACACAAGGATGA-3'   |
| <i>circMarch6</i> (Co)   | 5'-TAGGAGGAAATGGTGCAGAA-3'   | 5'-TTGACCGTCCTGGGCATCAG-3'   |
| <i>circZbtb44</i> (Di)   | 5'-TCACTGAAGGATTGCCTACA-3'   | 5'-AGGAGCTGTGAGTAAATGTT-3'   |
| <i>circZbtb44</i> (Co)   | 5'-GCTAGTACATGCTCAGAGTT-3'   | 5'-TGGAGCTATTTTCTTGCCA-3'    |
| <i>circMyh10</i> (Di)    | 5'-TCGTCAAGCTAAAGATGAGC-3'   | 5'-TGTGAGAAGAAGCAACGTGG-3'   |
| <i>circMyh10</i> (Co)    | 5'-CAATTCTGGAATCCTTTGGA-3'   | 5'-CAATATAGCCAGTTACATCA-3'   |
| <i>circCdk17</i> (Di)    | 5'-AGAGGAGACTTAAACTTGG-3'    | 5'-TGCAGTTCATCTCCACAGT-3'    |
| <i>circCdk17</i> (Co)    | 5'-CCACAACCTCTAATTAATCA-3'   | 5'-CTGCCGGAACCCTCTTCTTA-3'   |
| <i>Il22</i>              | 5'-CAACTGTTGACACTTGTGCGA-3'  | 5'-TGACGATGTATGGCTGCTGG-3'   |
| <i>Il17a</i>             | 5'-GCTGACCCCTAAGAAACCCC-3'   | 5'-GAAGCAGTTTGGGACCCCTT-3'   |
| <i>Irfng</i>             | 5'-AGACAATCAGGCCATCAGCA-3'   | 5'-TGGACCTGTGGGTTGTTGAC-3'   |
| <i>Batf</i>              | 5'-TGGGAGAGCCCGGAAGATTA-3'   | 5'-ATGAGTCCTGTTTGCCAGGG-3'   |
| <i>Mid1</i>              | 5'-TGATTGAGCCAATCCCGGAC-3'   | 5'-CTGGTCATCGGTCACACAGT-3'   |
| <i>Zfp189</i>            | 5'-GAAGGCTCCGGGAACCTTGAC-3'  | 5'-TCGCCTCGTTCAGGAATAGC-3'   |
| <i>Blzf1</i>             | 5'-TAAGCGTCCATACCGCTTGC-3'   | 5'-CGCCTCGCTCACTCTAATCA-3'   |
| <i>Tcf19</i>             | 5'-TCCTTGGCTGTCAAACCTCG-3'   | 5'-GTGTGACACGGGTCTTCTCC-3'   |
| <i>Ankra2</i>            | 5'-CAGCTGATCGTGGAAGAGTGT-3'  | 5'-TTTGGGTCTAGCTGGTGCTC-3'   |
| <i>E2f3</i>              | 5'-TCGGAAATGCCCTTACAGCA-3'   | 5'-ACTTCTTGGTGAGCAGACCG-3'   |
| <i>Clock</i>             | 5'-AACTCCCAGTCAGTTGGTCC-3'   | 5'-ATGCTGCATGGCTCCTAACT-3'   |
| <i>Zfp235</i>            | 5'-GAAATGTTCCAGCGCCAGTG-3'   | 5'-CCCGAGAAGACACACCGAAA-3'   |
| <i>Zfp27</i>             | 5'-TCATCCGAGATGATTCCGCA-3'   | 5'-GCATGATCACGCTGGGTCTA-3'   |
| <i>Kcnt2</i>             | 5'-TGCTGCATGCTAATTGCTTTGT-3' | 5'-AGCATTTTCCACATCCATGACT-3' |
| <i>Gaphd</i> (Di)        | 5'-GCTGAGTATGTCGTGGAGTCT-3'  | 5'-GGCAGCCCTGGTGACCAGGCGC-3' |
| <i>Gaphd</i> (Co)        | 5'-GCGCCTGGTCACCAGGGCTGCC-3' | 5'-AGACTCCACGACATACTCAGC-3'  |
| <i>18S</i>               | 5'-AACCCGTTGAACCCATT-3'      | 5'-CCATCCAATCGGTAGTAGCG-3'   |

**Supplementary Table 4. Primers for ChIP analysis**

| Genes              | Forward                     | Reverse                    |
|--------------------|-----------------------------|----------------------------|
| <i>Batf</i> pro#1  | 5'-GCTCAGGGGACGCTTGATTA-3'  | 5'-AGAGCACTTATCGTAGCCGC-3' |
| <i>Batf</i> pro#2  | 5'-ATCCACGTACCGAACTTATC-3'  | 5'-CCAGGCACACACCTGAGGTG-3' |
| <i>Batf</i> pro#3  | 5'-CACTTGACACTCCCTGATGT-3'  | 5'-AATAAAAGTCAATCCTTGTA-3' |
| <i>Batf</i> pro#4  | 5'-CAGGCAGAATTGTAATCAGT-3'  | 5'-TCCCAGTGTGGCTCAAATGC-3' |
| <i>Batf</i> pro#5  | 5'-GTACCCGAGGAGTCAGGAAG-3'  | 5'-GCTGCTCGTCCAGAGGACTT-3' |
| <i>Batf</i> pro#6  | 5'-CGTGTTTCGTGTCATGGGACA-3' | 5'-CTGCAATGAGGGATGACAAT-3' |
| <i>Batf</i> pro#7  | 5'-GATCTGACTCCAAGTCCAGA-3'  | 5'-TCTTCAGAAGTCAGTGACGT-3' |
| <i>Batf</i> pro#8  | 5'-TGCTTGGTCATCTGTAAAAG-3'  | 5'-ATGACCGGCCTTCCTCCTTC-3' |
| <i>Batf</i> pro#9  | 5'-AGGCCTGTGACCTGGAGGCT-3'  | 5'-GGCCAGAATTAGCAAGTTCT-3' |
| <i>Batf</i> pro#10 | 5'-CTTCATCAATTGAAGAGCGC-3'  | 5'-ACCACAGAATTAGGTGAAAG-3' |

**Supplementary Table 5. shRNA sequences used in this study**

| Genes               | shRNA sequences              |
|---------------------|------------------------------|
| <i>circKcnt2</i>    | 5'-TATCTTCACTTGGTCTCACAT-3'  |
| <i>circLinc1610</i> | 5'-TGGAATTCTCTGGAACCTTTGT-3' |
| <i>circPou2f1</i>   | 5'-GCTAAGACTCAAGAATGAATA-3'  |
| <i>circCcdc141</i>  | 5'-GTGCTAACAAGGTTTCTTCTT-3'  |
| <i>circAkap6</i>    | 5'-CATTGAAAGGAGACTCTGAAT-3'  |
| <i>circClec16a</i>  | 5'-GATGTCTTGGATCTGAAGATT-3'  |
| <i>circMarch6</i>   | 5'-CACATTAATAATGACAAATAT-3'  |
| <i>circZbtb44</i>   | 5'-AGATGACGATGACAGGATAAT-3'  |
| <i>circMyh10</i>    | 5'-GGAACACCTGAAATGGGTGAA-3'  |
| <i>circCdk17</i>    | 5'-CAAGAATTCTGAAGGGGAGTT-3'  |
